# Supplementary material for: The role of nature in cancer patients' lives: a systematic review and qualitative meta-synthesis
Source: Springer Nature journal article supplement (doi:10.1186/s12885-017-3366-6), 2017-05-25
Supplement: MOESM3 [file 12315854]

**Additional file 3 Excluded publications**

| <b>Author (Year)</b>   | <b>Topic</b>                                                                                    | <b>Reason for exclusion</b>                                        | <b>Source</b>     |
|------------------------|-------------------------------------------------------------------------------------------------|--------------------------------------------------------------------|-------------------|
| Abrams (2006)          | Role of gardening when dealing with cancer                                                      | Not peer-reviewed                                                  | CINAHL + PsycInfo |
| Baird and Bell (1995)  | Relevance of a window view during hospitalization (leukemia patient)                            | Theoretical exposition                                             | Snowballing       |
| Balen (1998)           | Issues of providing an outdoor activity week (pediatric cancer patients)                        | Quantitative research with minor and unclear qualitative component | Snowballing       |
| Bekesi (2011)          | Impact of camping experience on HQOL (chronic disease patients)                                 | Mixed clinical populations                                         | Snowballing       |
| Benson (1987)          | Impact of camping experience on Self-Concept (pediatric cancer patients)                        | No data concerning nature                                          | Snowballing       |
| Block (2004)           | Role of optimal healing environments in oncology                                                | Theoretical exposition                                             | OVIDMedline       |
| Bluebond-Langer (1990) | Impact of camping experience on perceptions of cancer and treatment (pediatric cancer patients) | No data concerning nature                                          | Snowballing       |
| Cimprich (2003)        | Environmental intervention for attention restoration (newly diagnosed breast cancer)            | Not qualitative research                                           | OVIDMedline       |
| Conrad (2009)          | Impact of camping experience on social support and adjustment (pediatric cancer patients)       | No data concerning nature                                          | Snowballing       |
| Dahlquist (2002)       | Distraction during surgical procedures (pediatric cancer patients)                              | Electronic toys, not nature related                                | OVIDMedline       |
| Epstein (2004)         | Adventure therapy for mental health promotion (pediatric cancer patients)                       | Description of intervention only                                   | OVIDMedline       |
| Epstein (2004)         | Adventure therapy for adolescents cancer patients                                               | Description of intervention only                                   | Snowballing       |
| Fillon (2014)          | Gardening as therapeutic intervention for cancer patients                                       | Not peer-reviewed                                                  | OVIDMedline       |
| Fried (2008)           | Therapeutic horticulture program for cancer patients                                            | Lacks methodological rigour and primary data                       | CINAHL + PsycInfo |
| Greenleaf (2014)       | Nature-based counseling in practice                                                             | Not cancer related                                                 | Snowballing       |
| Hancock (2011)         | Impact of camping experience for siblings (pediatric cancer patients)                           | Focus on family of patients not cancer patients                    | Snowballing       |
| Jankovich (1994)       | Communicating diagnosis with garden analogy (leukemia pediatric patients)                       | Lacks methodological rigour and primary data                       | Medline           |
| Jessee (1986)          | Nature experiences for hospitalized children                                                    | Not cancer related                                                 | Snowballing       |
| Kessell (1985)         | Adventure therapy for chronically ill and disabled youth                                        | Not cancer related                                                 | Snowballing       |
| Kiernan (2002)         | Children's perspectives of therapeutic recreation                                               | Mixed clinical populations, not clearly separated                  | Snowballing       |
| Kiernan (2005)         | Children's perspectives of therapeutic recreation                                               | Mixed clinical populations, not clearly separated                  | Snowballing       |
| Kinsella (2006)        | Safety of summer camp for children with chronic and/or life threatening illness                 | Mixed clinical populations                                         | Snowballing       |
| Lane (2005)            | Physical effects of dragon-boat training (breast cancer)                                        | Physical activity research                                         | Snowballing       |
| Lange (2010)           | Outdoor adventures for young adults with cancer                                                 | Not peer-reviewed                                                  | Snowballing       |

|                   |                                                                                                      |                                                                                                   |             |
|-------------------|------------------------------------------------------------------------------------------------------|---------------------------------------------------------------------------------------------------|-------------|
| Li (2009)         | Effect of phytoncide from trees on human natural killer cell function                                | Participants were not cancer patients                                                             | OVIDMedline |
| Li (2010)         | Physiological effects of day trip to a forest park (NK activity, expression of anti-cancer proteins) | Participants were not cancer patients                                                             | OVIDMedline |
| Li (2011)         | Effect of forest environments on human natural killer (NK) activity                                  | Participants were not cancer patients                                                             | OVIDMedline |
| Lombard (2014)    | Perceptions of gardening to prevent diabetes and cancer                                              | Not relevant                                                                                      | OVIDMedline |
| Martiniuk (2004)  | Camping programs for children with cancer and their families                                         | Literature Review, used for snowballing                                                           | Snowballing |
| McDonough (2008)  | Psychosocial effects of dragon boating (breast cancer survivors)                                     | Focus on body image and social support                                                            | Snowballing |
| McKenzie(1998)    | Effects of dragon boating (breast cancer)                                                            | Physical activity research                                                                        | Snowballing |
| Meltzer (2004)    | Camping for chronically ill children, respite care for mothers                                       | Mixed clinical populations                                                                        | Snowballing |
| Mitchell (2002)   | Effects of dragon boating (breast cancer)                                                            | Physical activity research                                                                        | Snowballing |
| Mitchell (2007)   | Effects of dragon boating (breast cancer survivors)                                                  | Physical activity research                                                                        | Snowballing |
| Morrison (2011)   | Pandemic (H1N1) outbreak during oncology camping                                                     | Not relevant                                                                                      | Snowballing |
| Nakau (2013)      | Intervention in urban green space for cancer patients                                                | Not qualitative research                                                                          | OVIDMedline |
| Packman (2004)    | Psychological effects of camping for siblings (pediatric cancer patients)                            | Focus on family of patients only                                                                  | Snowballing |
| Park (2002)       | Effects of plants on pain tolerance in a simulated hospital room                                     | Not cancer related                                                                                | ACTAHORT    |
| Park (2009)       | Impact of plants in hospital rooms on recovering from surgery                                        | Not cancer related                                                                                | ACTAHORT    |
| Parry (2008)      | Effects of dragon boating (breast cancer survivors)                                                  | Physical activity research                                                                        | Snowballing |
| Rogers (2011)     | Physical activity impact on fatigue and depression (breast cancer survivors)                         | Not qualitative research                                                                          | OVIDMedline |
| Rosenberg (2014)  | Impact of adventure program on body image and psychosocial functioning (young adult cancer patients) | Not qualitative research                                                                          | OVIDMedline |
| Saadatmand (2012) | Effect of nature-based sounds in hospital patients                                                   | Not cancer related                                                                                | Snowballing |
| Sabiston (2007)   | Impact of dragon Boating on positive psychological growth (breast cancer survivors)                  | Physical activity research                                                                        | Snowballing |
| Sahler (1989)     | Impact of camping program for siblings (pediatric cancer patients)                                   | Focus on family of patients not cancer patients                                                   | Snowballing |
| Sahlin (2012)     | Experiences of nature-based therapy in rehabilitation                                                | Participants were not cancer patients                                                             | AHTA        |
| Smith (1987)      | Impact of camping experience on family life (pediatric cancer patients)                              | Focus on social interaction and physical activity                                                 | Snowballing |
| Taft (2004)       | Therapeutic horticulture program for cancer patients                                                 | Not qualitative research                                                                          | AHTA        |
| Taft (2007)       | Therapeutic horticulture program for cancer patients                                                 | Lacks methodological rigour and data from health professionals not separated from cancer patients | AHTA        |
| Török (2006)      | Effectiveness of therapeutic camping (adolescent cancer patients and diabetes patients)              | No data concerning nature                                                                         | Snowballing |

|                    |                                                                                     |                                              |                   |
|--------------------|-------------------------------------------------------------------------------------|----------------------------------------------|-------------------|
| Wellisch (2006)    | Psychosocial impacts of camping experience (pediatric cancer patients and siblings) | Not qualitative research                     | Snowballing       |
| Whitehouse (2001)  | Evaluating oncology garden environment                                              | Post occupancy evaluation.                   | Snowballing       |
| Wu (2011)          | Experiences of oncology camping (pediatric cancer patients and siblings)            | No data concerning nature                    | Snowballing       |
| Wynn (2012)        | Experiences of adventure therapy (adolescent cancer survivors)                      | Lacks methodological rigour and primary data | CINAHL + PsycInfo |
| Yamane (2002)      | Physiological and emotional effects of indoor horticultural activities              | Not cancer related                           | ACTAHORT          |
| Young-Mason (2008) | Garden interventions for cancer patients                                            | Lacks methodological rigour and primary data | OVIDMedline       |
| Young-Mason (2010) | Role of plants and art in cancer care                                               | Theoretical exposition                       | CINAHL + PsycInfo |
