# Supplementary material for: The role of nature in cancer patients' lives: a systematic review and qualitative meta-synthesis
Source: BMC Cancer. 2017 May 25;17:370. doi: 10.1186/s12885-017-3366-6 (PMC5445345; doi:10.1186/s12885-017-3366-6)
Supplement: Supplementary file 1 — Search protocol. (PDF 46 kb) [file 12885_2017_3366_MOESM1_ESM.pdf]

## Additional file 1 Search protocol

---

### EBSCOhost: CINAHL & PsycInfo

Cluster 1: Exp Neoplasms/  
OR  
cancer\* or neoplasm\* or tumor\* or carcinoma\* or malignanc\* or leukemia\* or leukaemia\* or oncolog\* or metastas\*

AND

Cluster 2: garden\* or horticultur\* or wilderness or forest\* or woodland\*  
AND  
"natur\* based" or "natur\* assisted" or "urban green\*" or "green care" or "benefit\* of natur\*" or "natur\* setting\*" or "natur\* environment\*" or "outdoor nature" or "interacting with nature" or "nature experience\*" or "experiencing natur\*" or "nearby nature" or "environmental intervention" or "physical environment feature" or environment\* impact" or healing environment\*" or "outdoor\* environment\*" or "indoor plant\*" or "window view\*" or "restore attention" or "attention restoration" or "distraction therapy" or "distraction techniques" or " outdoor adventure" or "therapeutic camping" or windowless or "green park\*" or "urban park" or "nature based sound"

### Ovid: MEDLINE

Cluster 1: Exp Neoplasms/  
OR  
cancer\* or neoplasm\* or tumor\* or carcinoma\* or malignanc\* or leukemia\* or leukaemia\* or oncolog\* or metastas\*

AND

Cluster 2: garden\* or horticultur\* or wilderness or forest\* or woodland\*  
OR  
"natur\* based" or "natur\* assisted" or "urban green\*" or "green care" or "benefit\* of natur\*" or "natur\* setting\*" or "natur\* environment\*" or "outdoor nature" or "interacting with nature" or "nature experience\*" or "experiencing natur\*" or "nearby nature" or "environmental intervention" or "physical environment feature" or environment\* impact" or healing environment\*" or "outdoor\* environment\*" or "indoor plant\*" or "window view\*" or "restore attention" or "attention restoration" or "distraction therapy" or "distraction techniques" or " outdoor adventure" or "therapeutic camping" or windowless or "green park\*" or "urban park" or "nature based sound"

*Search Limits:* English language and humans and yr="1985 -Current

### Cochrane Database of Systematic Reviews

neoplasms  
OR  
cancer\* or neoplasm\* or tumor\* or carcinoma\* or malignanc\* or leukemia\* or leukaemia\* or oncolog\* or metastas\*

AND

garden\* or horticultur\* or wilderness or forest\* or woodland\* or natur\* or environment\* or park\* or "urban green\*" or "green care" or "indoor plant\*" or window\* or "restore attention" or "attention restoration" or "distraction therapy" or "distraction techniques" or outdoor\* or "therapeutic camping"

*Search Limits:* Publication Year from 1985 to 2015 (Word variations have been searched)

---
